# Supplementary material for: Phenylpropanoid-homoisoflavonoid derivatives from the fruits of Hippophae rhamnoides L. and their hepatoprotective and hypolipidemic activities
Source: Royal Society of Chemistry journal article supplement (doi:10.1039/d5fo04099j), 2026-01-01
Supplement: d5fo04099j1.pdf [file d5fo04099j1.pdf]

## Supplementary materials

### **Phenylpropanoid-homoisoflavonoid derivatives from the fruits of *Hippophae rhamnoides* L. and their hepatoprotective and hypolipidemic activities**

Qin-Ge Ma,<sup>a</sup> Yan-Li Shi,<sup>a</sup> Qi Li,<sup>a</sup> Xin Chen,<sup>a</sup> Liang Liu,<sup>a</sup> Wen-Min Liu,<sup>b,\*</sup> and Rong-Rui Wei<sup>a,\*</sup>

<sup>a</sup>School of Life Science and Technology & College of Medicine and Health Science, Wuhan Polytechnic University, Wuhan 430023, China.

<sup>b</sup>College of Chemistry and Pharmaceutical Engineering, Nanyang Normal University, Nanyang 473061, China.

\*Corresponding authors:

Wen-Min Liu, liuwm1969@163.com

Rong-Rui Wei, weirongrui2011@163.com

In this study, eleven known phenylpropanoid-homoisoflavonoid derivatives (**13-23**) were isolated from the fruits of *Hippophae rhamnoides* L. for the first time (Figure S1). These known compounds were determined as 3-(3',5'-dimethoxy-4'-hydroxybenzylidene)-5-hydroxy-8-prenyl-7''',8'''-isopropylpentenone-chromene-1''',4-dione (**13**), 3-(5'-methoxy-4'-hydroxybenzylidene)-5-hydroxy-8-(4'',5''-dimethylbutan-1''-one)-6''',7'''-(12''',13'''-dimethyl-furan-9'''-one)-chromene-1''',4-dione (**14**), 3-(4'-hydroxybenzylidene)-5-hydroxy-8-(6'',7''-dimethyl-furan-2''-one)-7''',8'''-(10'''-isopropanol-furan)-chromene-1''',4-dione (**15**), 3-(4'-hydroxybenzylidene)-8-(3'',3''-dimethyl-furan-2''-one)-6,7-dimethoxy-chroman-4-one (**16**), isointricatinol (**17**), (*E*)-3-(3-hydroxy-4-methoxybenzylidene)-5,7-dimethoxychroman-4-one (**18**), methylpogonone A (**19**), scillapersicene (**20**), 8-methoxy-bonducellin (**21**),<sup>61</sup> intricatinol (**22**), eucomin (**23**) by comparison of their spectral data and references. The structures of known compounds (**13-23**) are shown in Figure S1.

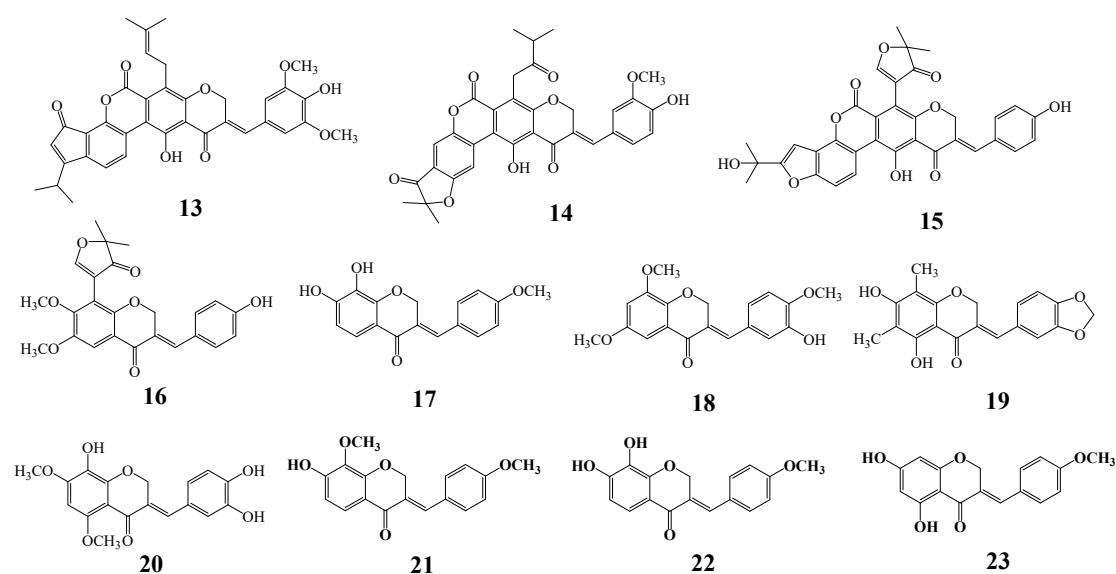

**Figure S1.** The structures of known compounds (**13-23**).
